# Supplementary material for: Quality Assessment of YUNYAO GNSS-RO Refractivity Data in the Neutral Atmosphere
Source: Copernicus journal article supplement (doi:10.5194/amt-2024-150), 2024-10-02
Supplement: Supplementary file 1 [file amt-2024-150-supplement.pdf]

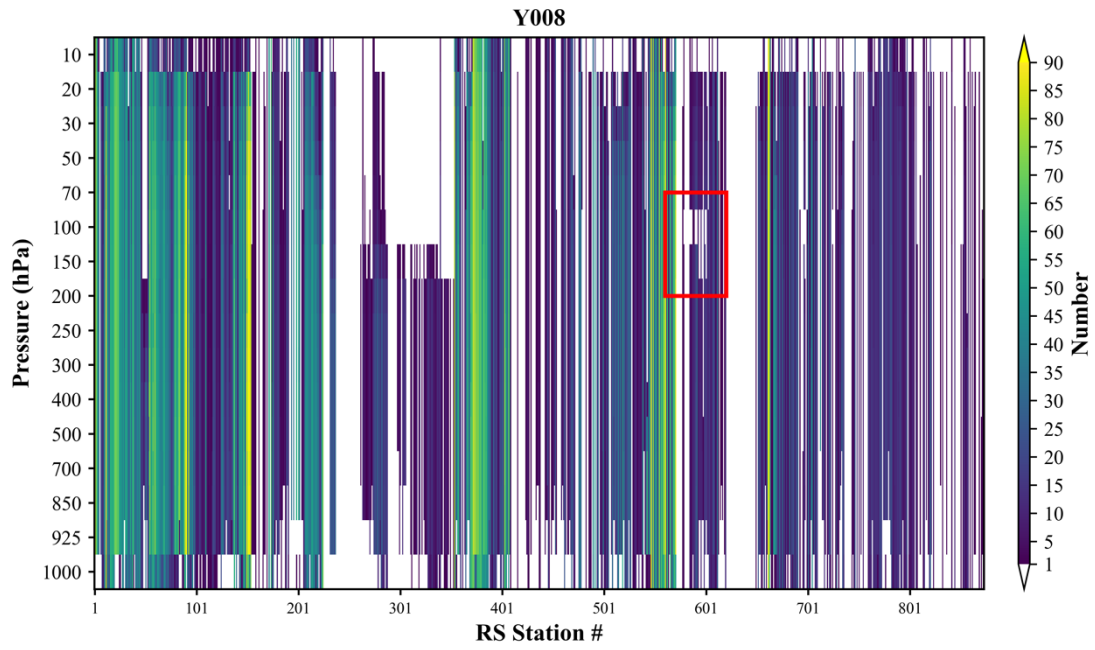

**Figure S1: The number of Y008 RO observations matched to each of the 873 RS stations.**

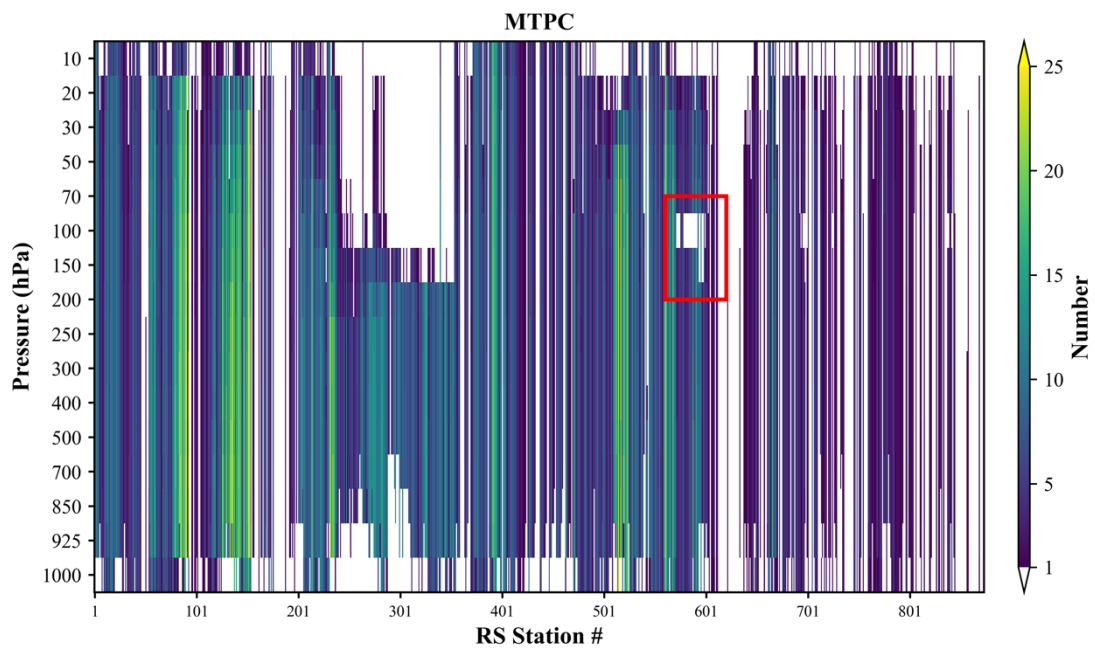

**Figure S1: The number of MTPC RO observations matched to each of the 873 RS stations.**

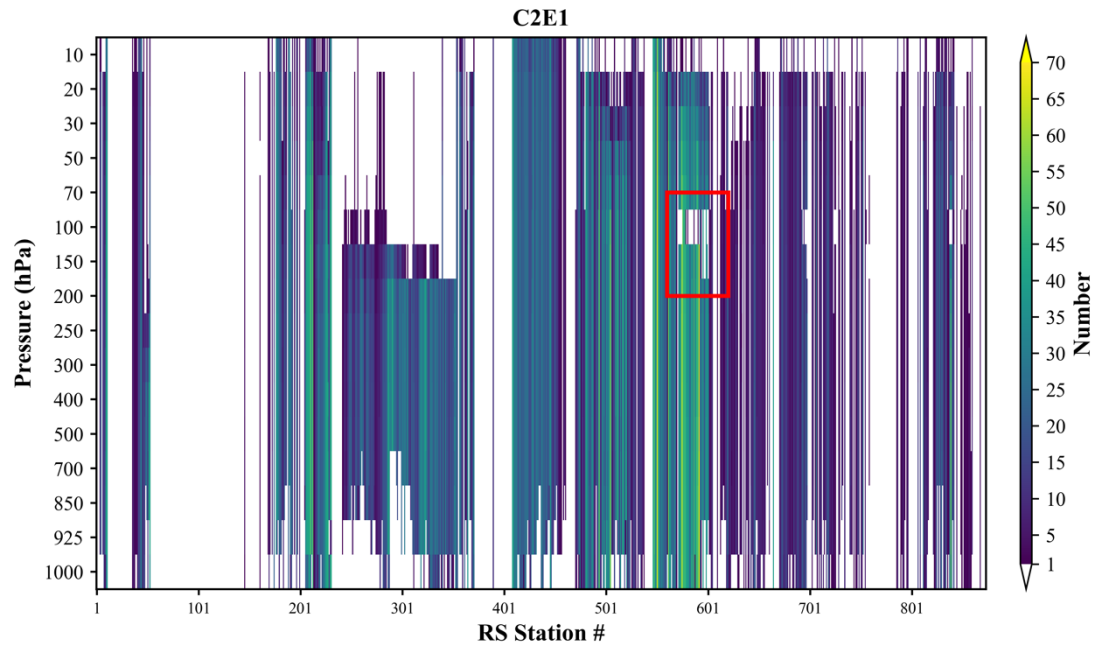

**Figure S1: The number of C2E1 RO observations matched to each of the 873 RS stations.**
