# Supplementary material for: Quality Assessment of YUNYAO GNSS-RO Refractivity Data in the Neutral Atmosphere
Source: Copernicus journal article supplement (doi:10.5194/amt-2024-150), 2024-10-02
Supplement: Supplementary file [file amt-2024-150-AC1-supplement.pdf]

## Reviewer #1:

1. This is a well-written paper and presents interesting results evaluating radio occultation (RO) observations from a constellation of eight small commercial satellites developed by Tianjin Yunyao Aerospace Technology. The eight Yunyao satellites produced about 12,000 RO occultations per day over the period May-June 2023. The quality of these observations are evaluated based on mean and standard deviations of Yunyao refractivities computed by comparing with radiosondes and two models, as well as the penetration rates (% of profiles reaching levels near the Earth's surface). This paper is a potentially valuable contribution and should be published, but there are several areas where improvements are needed.

Response: We appreciate the reviewer's positive evaluation of our work. We have actively adopted your suggestions for the manuscript and made modifications in accordance with your requests.

2. The paper says Yunyao plans to launch 90 satellites, which would provide an unprecedented number of RO profiles per day (probably greater than 150,000). The impact of this large number of RO profiles on NWP forecasts is expected to be very large, and hence this paper, which is the first to describe the quality of Yunyao RO observations, is important. The readers would be interested in the timeline for these launches and the likelihood that they will actually be launched. I know this is a hard question, but can the authors comment on this? Are the resources already obtained or are they merely a goal? Also, will all 90 satellites be launched into similar polar orbits, or will some be launched in low-inclination orbits? Some additional detail on the plans and their status would be useful.

Response: We are very grateful for your comments. We have further provided a timeline for the satellite launches (Table 2; Lines 51). The information in the table can serve as a reference for the launch schedule, but the actual launch dates may vary.

3. The methodology for evaluating the Yunyao observations in this paper is sound and the statistics look comparable to those from other RO missions. However, the paper only evaluates refractivities, and most current NWP models assimilate bending angles (BA). The paper would be improved if it evaluated BA rather than refractivities. The authors should explain why they chose refractivities instead of BA. If possible, they should include at least some BA evaluations in the paper.

Response: We agree with your comment. The original manuscript primarily focused on evaluating refractivity because CMA currently assimilates refractivity as the primary variable. Based on your suggestion, we further evaluated bending angles. Using the one-dimensional forward model in the Radio Occultation Processing Package (ROPP), we converted ERA5 variables into bending angles and compared them with the observations (Figures 5, S1). We have added a description of the methods in Sections 2.2.1 and 2.2.2, and included the results in Section 3.1 (lines 248-257).

4. The paper does not describe or provide a reference on how the Yunyao data are processed. Early studies of Yunyao BA data, which were graciously provided by Yunyao for the Radio Occultation Modeling Experiment (ROMEX), showed that there were issues in the BA uncertainties around 12 km, thought to be associated with the transition from geometric to wave optics. There was another issue of large standard deviations and large negative biases below 5 km in the BA, which was apparently due to very strict quality control in Yunyao's lower-level processing, where carrier phase measurements were removed from the excess phase data. There does seem to be large negative biases in the refractivities below 5 km in these results (Fig. 3); however, the refractivity error SD in these figures look reasonable. It would be good if the paper could summarize how the Yunyao data are processed and if the two issues above have been resolved in the current processing.

Response: We agree with your comment. Since the YUNYAO Data Processing Center introduced their GNSS-RO profile products, with the advice of Richard A. Anthes, Christian Marquardt and other experts, their GNSS-RO data processing methodology has been updated in three aspects. First, the deviation observed between 20 and 40 km, distinct from other GNSS-RO missions, was resolved by adjusting the smoothing window width for the exceed phase-to-Doppler inversion to optimize its adaptability to YUNYAO's high-sampling-rate data (100 Hz). Second, to address the sudden increase in SD below 12 km, YUNYAO investigated the open-/close-loop transition algorithms employed in other GNSS-RO missions. Their retrieval chain automatically identified the L1 open-/closed-loop splicing points through the L2 lock marks and used a sigmoid function as a weight to ensure a smooth transition from L1 closed-loop observations to open-loop observations. Third, for altitudes below 5 km, YUNYAO redesigned the L1 data truncation strategy to use the complete L1 open-loop observations as much as possible and process to obtain continuous exceed phases. In the geometric optics retrieval process, the Doppler retrieval truncation strategy is implemented by

identifying cases where the difference between the Doppler shift obtained from L1 and that from the empirical atmospheric model exceeds a specified threshold. In the wave optics retrieval process, the effective bending angle sequence is obtained by restoring the signal amplitude from the exceed phase at each height in the full spectrum inversion of the bending angle retrieval. The above strategies have dealt well with the preliminary product problems provided by YUNYAO in the ROMEX experiment. We also add descriptions in the manuscript (lines 68-80).

5. It would also be useful to include estimates of the error SD for the refractivity data up to 50-60 km, using the ERA5 and FNL model analyses as the other two datasets (extend Figs. 6-8 up to 50-60 km).

Response: Thank you very much for your suggestions. We apologize for not being able to provide results for the 50–60 km altitude range, as the ERA5 pressure-level data does not include atmospheric information at such high altitudes. The figure below shows the comparison between observations and ERA5 within the 0–50 km altitude range. As shown in the figure, the number of observations available for comparison decreases rapidly in the 40–50 km range, with almost no matching observations near 50 km, resulting in anomalous mean bias calculations. Therefore, we only presented results below 40 km in the manuscript. For Figs. 6–8 in the original manuscript, since we only obtained FNL data for the 26 mandatory levels (from 1000 hPa to 10 hPa), it was challenging to extend the results to higher atmospheric altitudes.

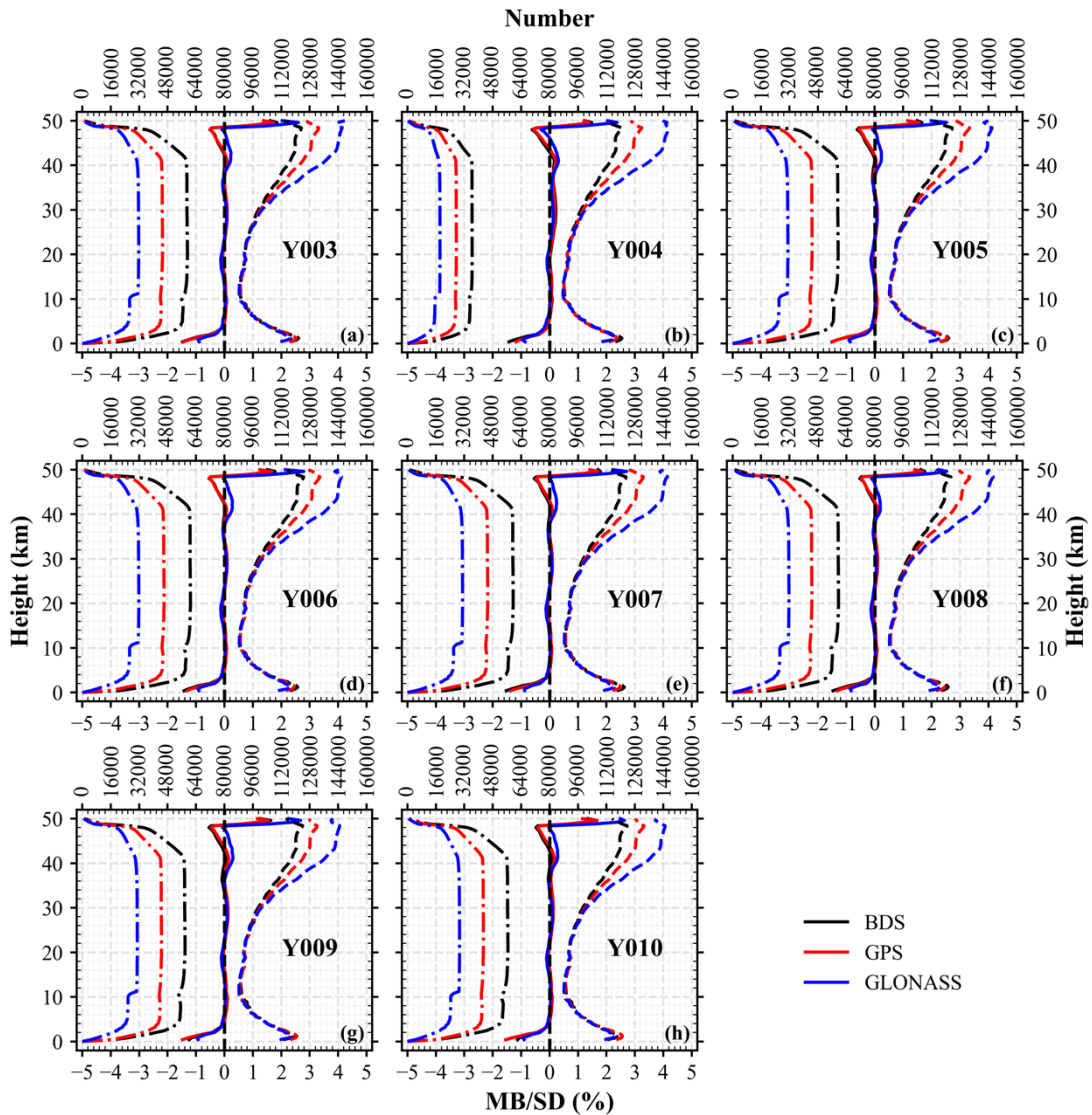

- As the paper notes, the radiosonde 3CH uncertainty estimates are less than those of the RO, which is different from the results of Schreiner et al. 2020 and Rieckh et al. 2021. They attribute this difference to the fact that they used a double-differencing correction to the radiosonde data, which is plausible since Rieckh et al. and Schreiner et al. did not. They could test their proposed reason easily by redoing their Fig. 5 with uncorrected radiosonde data and present the results in a second part to Fig. 5.

Response: Thank you for the suggestion. We have added the results without using spatial-temporal sampling correction (Fig. 6) and revised the relevant descriptions (lines 264–277). We found that the spatial-temporal sampling correction is indeed the main reason for the differences between our results and those of Schreiner et al. (2020) and Rieckh et al. (2021). For the results above 10 km, we speculate that the differences may be caused by variations in quality control.

7. The length of the paper is appropriate, and the quality of the figures overall is high, with a few exceptions (Fig. 2 and Fig. 4). Please see detailed comments on these figures.

In summary, this paper could be acceptable for publication after the authors consider the above comments. I look forward to seeing a revised version.

Response: Thank you for the suggestion. We have made revisions to the relevant content based on your suggestions (responses provided below).

8. Lines 45-46—The statement that CMA-GFS incorporates about 20,000 RO profiles per day is interesting, and it would be useful to summarize the impact of these observations and refer to a study that shows this impact if one exists. By coincidence, this number is the number that the WMO International Working Group on Radio Occultation (IROWG) has been recommending for many years now for an operational RO backbone. Are there any published studies or reports that discuss the impact of these observations on the CMA forecasts?

Response: Thank you for the suggestion. We sincerely apologize that no study has systematically evaluated the impact of these observations. However, we have provided the source of the 20,000 profiles (Table 1).

9. Lines 69-70—I am sure the three references here do not demonstrate that the Yunyao receivers are “significantly smaller and lighter” than the COSMIC and Metop/GRAS receivers. I don’t doubt that they are, but some numbers should be given, i.e. how much smaller and lighter?

Response: Thank you for the suggestion. We sincerely apologize that the references indeed do not contain information about the size and weight of the COSMIC and Metop/GRAS receivers. However, Sun et al. (2018) provides a description of the weight of the FengYun-3C/GNOS. We have revised the content (lines 70-72).

10. The penetration depths (minimum heights above ground reached by the RO profiles) shown in Fig. 2 are not very clear. For example, the color difference between 500 m and 2 km (a large difference in penetration depth) is very small, and it is difficult to distinguish between them. I suggest contours of penetration depth with a contour interval of 250 or 500 m for these figures, probably after the data in the grid boxes are smoothed. Alternatively, plot cumulative % profiles of penetration depths of zonal averages of the profiles for several representative latitudes for the GPS, GLONASS and BDS, similar to Fig. 2 of Schreiner et al. (2020).

Response: Thank you for the suggestion. We have redrawn Figure 2, modified the colorbar, and set

a color interval of 500 meters. We believe that the current figure more clearly displays the values in different regions. We did not apply smoothing or draw contour lines because the grid resolution of the figure is relatively low, and smoothing could distort the results.

11. Line 183—Give the value of the mean bias between 4-40 km, and also 10-30 km (the sweet spot for RO).

Response: Thank you for the suggestion. We have made modifications based on your suggestions (lines 220-223).

12. 4-Similar to the comment for Fig. 2, the colors for the middle panel (SD) do not show the variations clearly (everything is dark blue) Again, contours of the smoothed data would be clearer.

Response: Thank you for the suggestion. We have redrawn Figures 4 and 1 and modified the colorbar. We believe the current figures more clearly display the values at different locations.

13. 4, right panel: Why is the latitude distribution of numbers not symmetric? There are many more between 25-40°S than 25-40°N.

Response: The YUNYAO satellite's data transmission to the ground is primarily dependent on ground stations located within China. During the data transmission process, the satellite is required to execute specific onboard operations, thereby reducing the number of occultation observations over China and its surrounding areas, as well as throughout its entire trajectory from the United States into China. We have added the relevant content to the manuscript (lines 93-97).

14. Line 192: These are fairly small differences, and may not be important for DA. Also, most models assimilate BA not N.

Response: We have removed this part of the description (line 229).

15. Line 211: Fig. 4 should be Fig. 5.

Response: Thank you for your careful review. We have made modifications in the manuscript (line 265).

16. Line 227: "is" should be "are."

Response: Thank you for your careful review. We have made modifications in the manuscript (line 287).

17. Line 253: Shouldn't 8a be 7a?

Response: Thank you for your careful review. We have made modifications in the manuscript (line 313).

18. Line 314: Earlier you said the double differencing was the likely reason for the radiosondes SD being less than the RO SD, and I think this is probably the main reason. You should mention this here. Or, since this is not a major conclusion for this study, you could delete reference to it in the Summary and Conclusions section.

Response: Thank you for your careful review. We have added the relevant content to the Summary and Conclusions section (lines 374-376).
